# Supplementary material for: Modeling the Residential Infiltration of Outdoor PM2.5 in the Multi-Ethnic Study of Atherosclerosis and Air Pollution (MESA Air)
Source: PubMed Central journal article supplement (PMC3385439; doi:10.1289/ehp.1104447), 2012-02-22
Supplement: ehp.1104447.s001.pdf [file ehp.1104447.s001.pdf]

**Supplemental Material:**

**Modeling the Residential Infiltration of Outdoor PM<sub>2.5</sub> in the  
Multi-Ethnic Study of Atherosclerosis and Air Pollution (MESA Air)**

Ryan W. Allen<sup>1\*</sup>, Sara D. Adar<sup>2</sup>, Ed Avol<sup>3</sup>, Martin Cohen<sup>4</sup>, Cynthia L. Curl<sup>4</sup>,  
Timothy Larson<sup>4,5</sup>, L.-J. Sally Liu<sup>4,6</sup>, Lianne Sheppard<sup>4,7</sup>, and Joel D. Kaufman<sup>4,8,9</sup>

<sup>1</sup>Faculty of Health Sciences, Simon Fraser University, Burnaby, BC, Canada

<sup>2</sup>Department of Epidemiology, University of Michigan, Ann Arbor, MI, USA

<sup>3</sup>Department of Preventive Medicine, University of Southern California, Los Angeles, CA, USA

<sup>4</sup>Department of Environmental & Occupational Health Sciences, University of Washington,  
Seattle, WA, USA

<sup>5</sup>Department of Civil and Environmental Engineering, University of Washington, Seattle, WA,  
USA

<sup>6</sup>Institute of Social and Preventive Medicine, University of Basel, Basel, Switzerland

<sup>7</sup>Department of Biostatistics, University of Washington, Seattle, WA, USA

<sup>8</sup>Department of Epidemiology, University of Washington, Seattle, WA, USA

<sup>9</sup>Department of Medicine, University of Washington, Seattle, WA, USA

## Table of Contents for Supplementary Material

|                                                                                                                                                                                                    | Page |
|----------------------------------------------------------------------------------------------------------------------------------------------------------------------------------------------------|------|
| Methods                                                                                                                                                                                            |      |
| Data Reduction                                                                                                                                                                                     | 3    |
| Calculation of Contributions to Indoor Concentrations                                                                                                                                              | 3    |
| Model Development                                                                                                                                                                                  | 4    |
| References                                                                                                                                                                                         | 5    |
| Table 1: Comparison of selected home and resident characteristics between the full MESA Air cohort and the subgroup selected for home indoor/outdoor (I/O) sampling.                               | 6    |
| Table 2: Mean ( $\pm$ SD) 2-week PM <sub>2.5</sub> concentrations and estimated indoor and outdoor contributions to indoor PM <sub>2.5</sub> concentrations by community and season.               | 7    |
| Table 3: Main MESA Air Questionnaire questions used to derive predictors in the generalizable and 2-week specific infiltration efficiency models.                                                  | 8    |
| Table 4: Infiltration Questionnaire questions used to derive predictors in the 2-week specific infiltration efficiency models.                                                                     | 9    |
| Figure 1. Infiltration efficiency vs. average outdoor temperature during the 2-week sampling period among a) homes not using air conditioning and b) homes using air conditioning.                 | 10   |
| Figure 2: Comparisons of measured infiltration efficiencies (x-axes) with values predicted from a leave-one-community out cross validation (y-axes) for the generalizable models shown in Table 2. | 11   |

## Methods

### *Data Reduction*

After QA/QC checks for pump failures, dropped/torn filters, etc., there were 573 valid I/O sulfur pairs. To minimize the influence of indoor sulfur sources, we excluded 22 observations where the participant reported that smoking had occurred in the home during the 2-week period, and 6 cold season observations from homes with kerosene heaters (Koutrakis et al. 1992). We also removed 11 observations where the I/O sulfur ratio was greater than 1.05, which indicated an indoor sulfur source. We included ratios between 1.00 and 1.05 to account for imprecision in the sulfur measurements. We also excluded 6 observations where the participants reported that the home was “smoky from cooking” for  $\geq 10$  hours during the 2-week sampling period, since window opening and other behaviors during such periods may not represent typical conditions. To minimize the influence of extreme values on the  $F_{\text{inf}}$  models, we also removed one distant outlier ( $F_{\text{inf}}$  more than 3 interquartile ranges below the community- and season-specific 25<sup>th</sup> percentile) in Los Angeles and New York. These exclusions left 526 I/O sulfur pairs (from 353 homes) for analysis.

### *Calculation of Contributions to Indoor Concentrations*

For each valid  $F_{\text{inf}}$  observation, we estimated the infiltrated ( $PM_{2.5}^{\text{inf}}$ ) and indoor-generated ( $PM_{2.5}^{\text{ig}}$ ) contributions to the 2-week average indoor  $PM_{2.5}$  concentrations based on the measured  $PM_{2.5}$  concentrations outdoors ( $PM_{2.5}^{\text{outdoor}}$ ) and indoors ( $PM_{2.5}^{\text{indoor}}$ ) and the home-specific estimate of  $F_{\text{inf}}$  (Allen et al. 2004):

$$PM_{2.5}^{\text{inf}} = F_{\text{inf}} \times PM_{2.5}^{\text{outdoor}} \quad (1)$$

and

$$PM_{2.5}^{\text{ig}} = PM_{2.5}^{\text{indoor}} - PM_{2.5}^{\text{inf}} \quad (2)$$

When  $PM_{2.5}^{inf} > PM_{2.5}^{indoor}$ , we set  $PM_{2.5}^{inf} = PM_{2.5}^{indoor}$  and  $PM_{2.5}^{ig} = 0$ .

### ***Model Development***

We developed models using two approaches. In the first approach we 1) calculated the correlations between each predictor and  $F_{inf}$ , 2) offered the significantly ( $p < 0.1$ ) correlated predictors into a stepwise linear regression ( $p < 0.30$  to enter;  $p < 0.10$  to remain) with  $F_{inf}$  as the dependent variable, and 3) removed predictors that contributed less than 0.01 to the model  $R^2$ . In the second approach, we 1) calculated the correlations between each predictor and  $F_{inf}$ , 2) entered the highest-correlated predictor into a model with  $F_{inf}$  as the dependent variable, 3) calculated the model residuals, 4) calculated the correlations between the model residuals and all remaining predictors, 5) added the highest-correlated predictor as an additional predictor in the model with  $F_{inf}$  as the dependent variable, and 6) repeated steps 3-5 until the model included all variables with  $p < 0.10$  that contributed at least 0.01 to the model  $R^2$ . Under both methods, we only included predictors for which the coefficient's sign was consistent with physical processes (e.g., positive coefficients for window opening). Since the models were developed to predict  $F_{inf}$ , we did not account for possible dependence between measurements made in the same home or in the same community. In the preliminary community-specific models we required that every variable have at least 4 non-zero observations to be included in the model.

**References**

- Allen R, Wallace L, Larson T, Sheppard L, Liu LJS. 2004. Estimated hourly personal exposures to ambient and nonambient particulate matter among sensitive populations in Seattle, Washington. *J Air Waste Manag Assoc* 54(9):1197-1211.
- Koutrakis P, Briggs SLK, Leaderer BP. 1992. Source Apportionment Of Indoor Aerosols In Suffolk And Onondaga Counties, New-York. *Environ Sci Technol* 26(3):521-527.

**Supplemental Material Table 1. Comparison of selected home and resident characteristics between the full MESA Air cohort and the subgroup selected for home indoor/outdoor (I/O) sampling.**

| Community     | Total number of homes |           | Single family / free standing home <sup>a</sup> |                | Central AC used in the past July <sup>b</sup> |                | Usually had windows open in the past summer <sup>c</sup> |                | HEPA filter / electrostatic precipitator used <sup>d</sup> |                | Smoking inside the home in the past year <sup>e</sup> |                |
|---------------|-----------------------|-----------|-------------------------------------------------|----------------|-----------------------------------------------|----------------|----------------------------------------------------------|----------------|------------------------------------------------------------|----------------|-------------------------------------------------------|----------------|
|               | All Homes             | I/O Homes | % of All Homes                                  | % of I/O Homes | % of All Homes                                | % of I/O Homes | % of All Homes                                           | % of I/O Homes | % of All Homes                                             | % of I/O Homes | % of All Homes                                        | % of I/O Homes |
| Baltimore     | 721                   | 56        | 62                                              | 64             | 64                                            | 54             | 64                                                       | 68             | 6                                                          | 7              | 19                                                    | 5              |
| Chicago       | 1,146                 | 46        | 41                                              | 54             | 56                                            | 67             | 75                                                       | 74             | 16                                                         | 24             | 16                                                    | 0              |
| Los Angeles   | 1,176                 | 89        | 71                                              | 78             | 42                                            | 45             | 89                                                       | 84             | 6                                                          | 8              | 10                                                    | 4              |
| New York      | 1,103                 | 39        | 7                                               | 3              | 6                                             | 0              | 90                                                       | 92             | 3                                                          | 5              | 20                                                    | 8              |
| Rockland      | 100                   | 18        | 71                                              | 72             | 55                                            | 39             | 89                                                       | 94             | 11                                                         | 17             | 13                                                    | 6              |
| St. Paul      | 879                   | 50        | 71                                              | 82             | 47                                            | 54             | 86                                                       | 80             | 8                                                          | 6              | 21                                                    | 4              |
| Winston-Salem | 890                   | 55        | 89                                              | 98             | 88                                            | 93             | 36                                                       | 27             | 12                                                         | 16             | 21                                                    | 0              |
| Total         | 6,015                 | 353       | 55                                              | 68             | 49                                            | 56             | 75                                                       | 72             | 9                                                          | 11             | 17                                                    | 4              |

Based on responses provided on the MESA Air Questionnaire at study entry. Questions were worded as follows:

<sup>a</sup> “What type of building do you live in?” = Single-family or free-standing.

<sup>b</sup> “What type of air conditioning does your residence have?” = Central AC + “How often was the air conditioning used in the past July?” ≥ A few days a month

<sup>c</sup> “How many windows did you usually have open in the past summer?” = All or Some

<sup>d</sup> “What type of air cleaner/filter is used in your residence?” = HEPA filter and/or electrostatic precipitator

<sup>e</sup> “Did anyone smoke in your residence in the past 12 months (this includes you)?” = Yes

**Supplemental Material Table 2. Mean ( $\pm$  SD) 2-week PM<sub>2.5</sub> concentrations and estimated indoor and outdoor contributions to indoor PM<sub>2.5</sub> concentrations by community and season.**

| Community     | Season <sup>a</sup> | Observations (Homes) <sup>b</sup> | Outdoor Sulfur ( $\mu\text{g}/\text{m}^3$ ) | Indoor Sulfur ( $\mu\text{g}/\text{m}^3$ ) | Outdoor PM <sub>2.5</sub> ( $\mu\text{g}/\text{m}^3$ ) | Indoor PM <sub>2.5</sub> ( $\mu\text{g}/\text{m}^3$ ) | Indoor-Generated Indoor PM <sub>2.5</sub> ( $\mu\text{g}/\text{m}^3$ ) | Infiltrated Indoor PM <sub>2.5</sub> ( $\mu\text{g}/\text{m}^3$ ) | Infiltrated PM <sub>2.5</sub> Contribution to Indoor PM <sub>2.5</sub> (%) |
|---------------|---------------------|-----------------------------------|---------------------------------------------|--------------------------------------------|--------------------------------------------------------|-------------------------------------------------------|------------------------------------------------------------------------|-------------------------------------------------------------------|----------------------------------------------------------------------------|
| Baltimore     | Cold                | 48 (41)                           | 1.19 $\pm$ 0.24                             | 0.63 $\pm$ 0.23                            | 11.8 $\pm$ 2.5                                         | 7.9 $\pm$ 2.9                                         | 1.9 $\pm$ 2.3                                                          | 6.0 $\pm$ 2.0                                                     | 80.3 $\pm$ 20.1                                                            |
|               | Warm                | 39 (36)                           | 2.22 $\pm$ 0.52                             | 1.29 $\pm$ 0.56                            | 16.8 $\pm$ 3.7                                         | 12.5 $\pm$ 5.7                                        | 2.7 $\pm$ 3.6                                                          | 9.7 $\pm$ 4.3                                                     | 80.3 $\pm$ 17.9                                                            |
| Chicago       | Cold                | 40 (33)                           | 1.00 $\pm$ 0.25                             | 0.56 $\pm$ 0.24                            | 13.3 $\pm$ 3.3                                         | 9.1 $\pm$ 4.2                                         | 2.4 $\pm$ 4.3                                                          | 6.7 $\pm$ 2.0                                                     | 80.9 $\pm$ 22.8                                                            |
|               | Warm                | 28 (27)                           | 1.39 $\pm$ 0.37                             | 0.87 $\pm$ 0.45                            | 14.0 $\pm$ 3.0                                         | 12.1 $\pm$ 6.0                                        | 3.6 $\pm$ 4.6                                                          | 8.5 $\pm$ 3.7                                                     | 74.8 $\pm$ 19.5                                                            |
| Los Angeles   | Cold                | 80 (71)                           | 0.87 $\pm$ 0.59                             | 0.66 $\pm$ 0.51                            | 17.2 $\pm$ 8.1                                         | 13.9 $\pm$ 8.6                                        | 2.8 $\pm$ 4.9                                                          | 11.1 $\pm$ 5.7                                                    | 84.9 $\pm$ 18.7                                                            |
|               | Warm                | 53 (52)                           | 1.51 $\pm$ 0.53                             | 1.19 $\pm$ 0.55                            | 16.0 $\pm$ 2.6                                         | 13.7 $\pm$ 3.7                                        | 1.5 $\pm$ 2.1                                                          | 12.2 $\pm$ 3.5                                                    | 89.4 $\pm$ 12.5                                                            |
| New York      | Cold                | 24 (23)                           | 1.29 $\pm$ 0.56                             | 0.91 $\pm$ 0.24                            | 16.2 $\pm$ 6.8                                         | 16.4 $\pm$ 10.7                                       | 5.4 $\pm$ 9.4                                                          | 11.0 $\pm$ 2.8                                                    | 76.1 $\pm$ 22.5                                                            |
|               | Warm                | 26 (23)                           | 1.68 $\pm$ 0.47                             | 1.52 $\pm$ 0.46                            | 15.7 $\pm$ 3.2                                         | 17.3 $\pm$ 6.5                                        | 3.2 $\pm$ 6.6                                                          | 14.2 $\pm$ 3.5                                                    | 86.5 $\pm$ 17.8                                                            |
| Rockland      | Cold                | 12 (11)                           | 0.89 $\pm$ 0.12                             | 0.49 $\pm$ 0.15                            | 9.8 $\pm$ 2.8                                          | 7.7 $\pm$ 2.7                                         | 2.3 $\pm$ 2.0                                                          | 5.4 $\pm$ 1.9                                                     | 71.3 $\pm$ 19.6                                                            |
|               | Warm                | 11 (11)                           | 2.05 $\pm$ 0.47                             | 1.41 $\pm$ 0.56                            | 17.0 $\pm$ 3.8                                         | 14.3 $\pm$ 6.5                                        | 3.2 $\pm$ 4.7                                                          | 11.1 $\pm$ 4.1                                                    | 79.4 $\pm$ 17.9                                                            |
| St. Paul      | Cold                | 56 (45)                           | 0.69 $\pm$ 0.15                             | 0.35 $\pm$ 0.18                            | 10.0 $\pm$ 3.5                                         | 7.2 $\pm$ 5.9                                         | 2.8 $\pm$ 5.1                                                          | 4.4 $\pm$ 2.0                                                     | 72.5 $\pm$ 23.6                                                            |
|               | Warm                | 23 (23)                           | 0.90 $\pm$ 0.32                             | 0.56 $\pm$ 0.30                            | 9.8 $\pm$ 1.7                                          | 7.3 $\pm$ 2.6                                         | 1.2 $\pm$ 1.3                                                          | 6.1 $\pm$ 3.1                                                     | 82.4 $\pm$ 19.6                                                            |
| Winston-Salem | Cold                | 47 (40)                           | 1.18 $\pm$ 0.27                             | 0.60 $\pm$ 0.22                            | 12.6 $\pm$ 2.8                                         | 9.3 $\pm$ 4.1                                         | 3.0 $\pm$ 3.4                                                          | 6.3 $\pm$ 2.4                                                     | 72.4 $\pm$ 20.7                                                            |
|               | Warm                | 39 (36)                           | 2.38 $\pm$ 0.63                             | 1.00 $\pm$ 0.43                            | 18.6 $\pm$ 3.8                                         | 11.9 $\pm$ 5.0                                        | 4.1 $\pm$ 4.1                                                          | 7.8 $\pm$ 3.1                                                     | 69.6 $\pm$ 21.1                                                            |
| All           | Cold                | 307 (264)                         | 0.98 $\pm$ 0.43                             | 0.60 $\pm$ 0.35                            | 13.5 $\pm$ 5.8                                         | 10.4 $\pm$ 7.0                                        | 2.8 $\pm$ 4.8                                                          | 7.6 $\pm$ 4.3                                                     | 78.3 $\pm$ 21.5                                                            |
|               | Warm                | 219 (208)                         | 1.76 $\pm$ 0.69                             | 1.12 $\pm$ 0.55                            | 15.8 $\pm$ 3.9                                         | 12.8 $\pm$ 5.6                                        | 2.7 $\pm$ 4.0                                                          | 10.1 $\pm$ 4.3                                                    | 80.7 $\pm$ 18.9                                                            |

<sup>a</sup> Cold and warm seasons defined as  $\leq 18$  °C and  $> 18$  °C, respectively, during the 2-week I/O sampling period

<sup>b</sup> Some homes were monitored twice in the same season.

**Supplemental Material Table 3. Main MESA Air Questionnaire questions used to derive predictors in the generalizable and 2-week specific infiltration efficiency models.**

| <b>Predictor</b>                                    | <b>Questions</b>                                                                                           | <b>Response(s)<sup>a</sup></b>                                                                                        |
|-----------------------------------------------------|------------------------------------------------------------------------------------------------------------|-----------------------------------------------------------------------------------------------------------------------|
| <b>Central AC used a few days in the past July</b>  | Do you use air conditioning in your residence?                                                             | Yes                                                                                                                   |
|                                                     | What type of air conditioning does your residence have?                                                    | Central A/C                                                                                                           |
|                                                     | How often was the air conditioning used in the past July?                                                  | A few days a month                                                                                                    |
| <b>Central AC used &gt; ½ time in the past July</b> | Do you use air conditioning in your residence?                                                             | Yes                                                                                                                   |
|                                                     | What type of air conditioning does your residence have?                                                    | Central A/C                                                                                                           |
|                                                     | How often was the air conditioning used in the past July?                                                  | More than half the days of the month, but less than daily<br>OR Almost daily (thermostat use also)                    |
| <b>Central AC used at all in the past July</b>      | Do you use air conditioning in your residence?                                                             | Yes                                                                                                                   |
|                                                     | What type of air conditioning does your residence have?                                                    | Central A/C                                                                                                           |
|                                                     | How often was the air conditioning used in the past July?                                                  | A few days a month OR More than half the days of the month, but less than daily OR Almost daily (thermostat use also) |
| <b>Home has forced air heat</b>                     | What are the heating sources used in your residence? Please check all that are used at least once a month. | Forced air (vents)                                                                                                    |
| <b>Home has double pane windows</b>                 | Does your residence have double pane windows?                                                              | Yes                                                                                                                   |
| <b>Windows open ≥ ½ time in the past summer</b>     | In summer (Jun – Aug) how many windows did you usually have open?                                          | All OR Some                                                                                                           |
|                                                     | In summer (Jun – Aug) how often did you open windows?                                                      | More than half the days of the month, but less than daily<br>OR Almost daily                                          |
| <b>Windows open ≥ ½ time in the past winter</b>     | In winter (Dec – Feb) how many windows did you usually have open?                                          | All OR Some                                                                                                           |
|                                                     | In winter (Dec – Feb) how often did you open windows?                                                      | More than half the days of the month, but less than daily<br>OR Almost daily                                          |

<sup>a</sup>Homes with these responses were coded as 1; homes with other responses were all coded as 0.



**Supplemental Material Table 4. Infiltration Questionnaire questions used to derive predictors in the 2-week specific infiltration efficiency models.**

| <b>Predictor</b>                                                  | <b>Questions</b>                                                                                  | <b>Response(s)<sup>a</sup></b>            |
|-------------------------------------------------------------------|---------------------------------------------------------------------------------------------------|-------------------------------------------|
| <b>Central AC used <math>\geq</math> 6 days during sampling</b>   | Does your home have air conditioning?                                                             | Yes                                       |
|                                                                   | What type of air conditioning does your residence have?                                           | Central A/C                               |
|                                                                   | How often did you use air conditioning in the past 12-14 days?                                    | 6 – 10 days OR 11-14 days                 |
| <b>Central AC used <math>\geq</math> 11 days during sampling</b>  | Does your home have air conditioning?                                                             | Yes                                       |
|                                                                   | What type of air conditioning does your residence have?                                           | Central A/C                               |
|                                                                   | How often did you use air conditioning in the past 12-14 days?                                    | 11-14 days                                |
| <b>HEPA or ESP used <math>\geq</math> 11 days during sampling</b> | During the past 12-14 days, was an air cleaner/filter (stand-alone or central) used in your home? | Yes                                       |
|                                                                   | What kind of air cleaner did you use?                                                             | HEPA filter OR Electrostatic precipitator |
|                                                                   | How often was the air cleaner/filter used in the past 12-14 days?                                 | 11-14 days                                |
| <b>Windows open 6-10 days during sampling</b>                     | During the past 12-14 days, how often did you have windows open?                                  | 6-10 days                                 |
| <b>Windows open <math>\geq</math> 11 days during sampling</b>     | During the past 12-14 days, how often did you have windows open?                                  | 11-14 days                                |

<sup>a</sup>Homes with these responses were coded as 1; homes with other responses were all coded as 0.

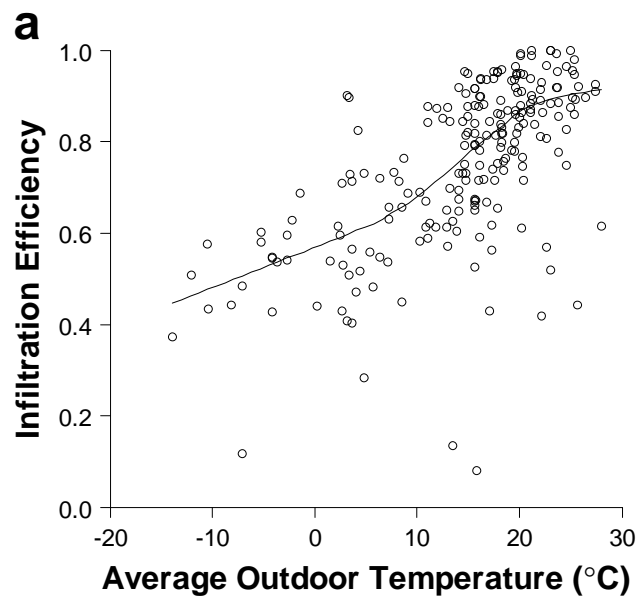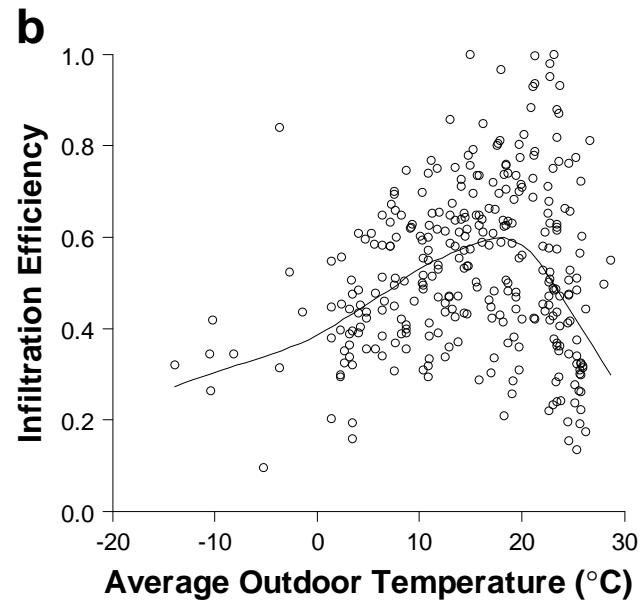

**Supplemental Material Figure 1. Infiltration efficiency vs. average outdoor temperature during the 2-week sampling period among a) homes not using air conditioning and b) homes using air conditioning.**

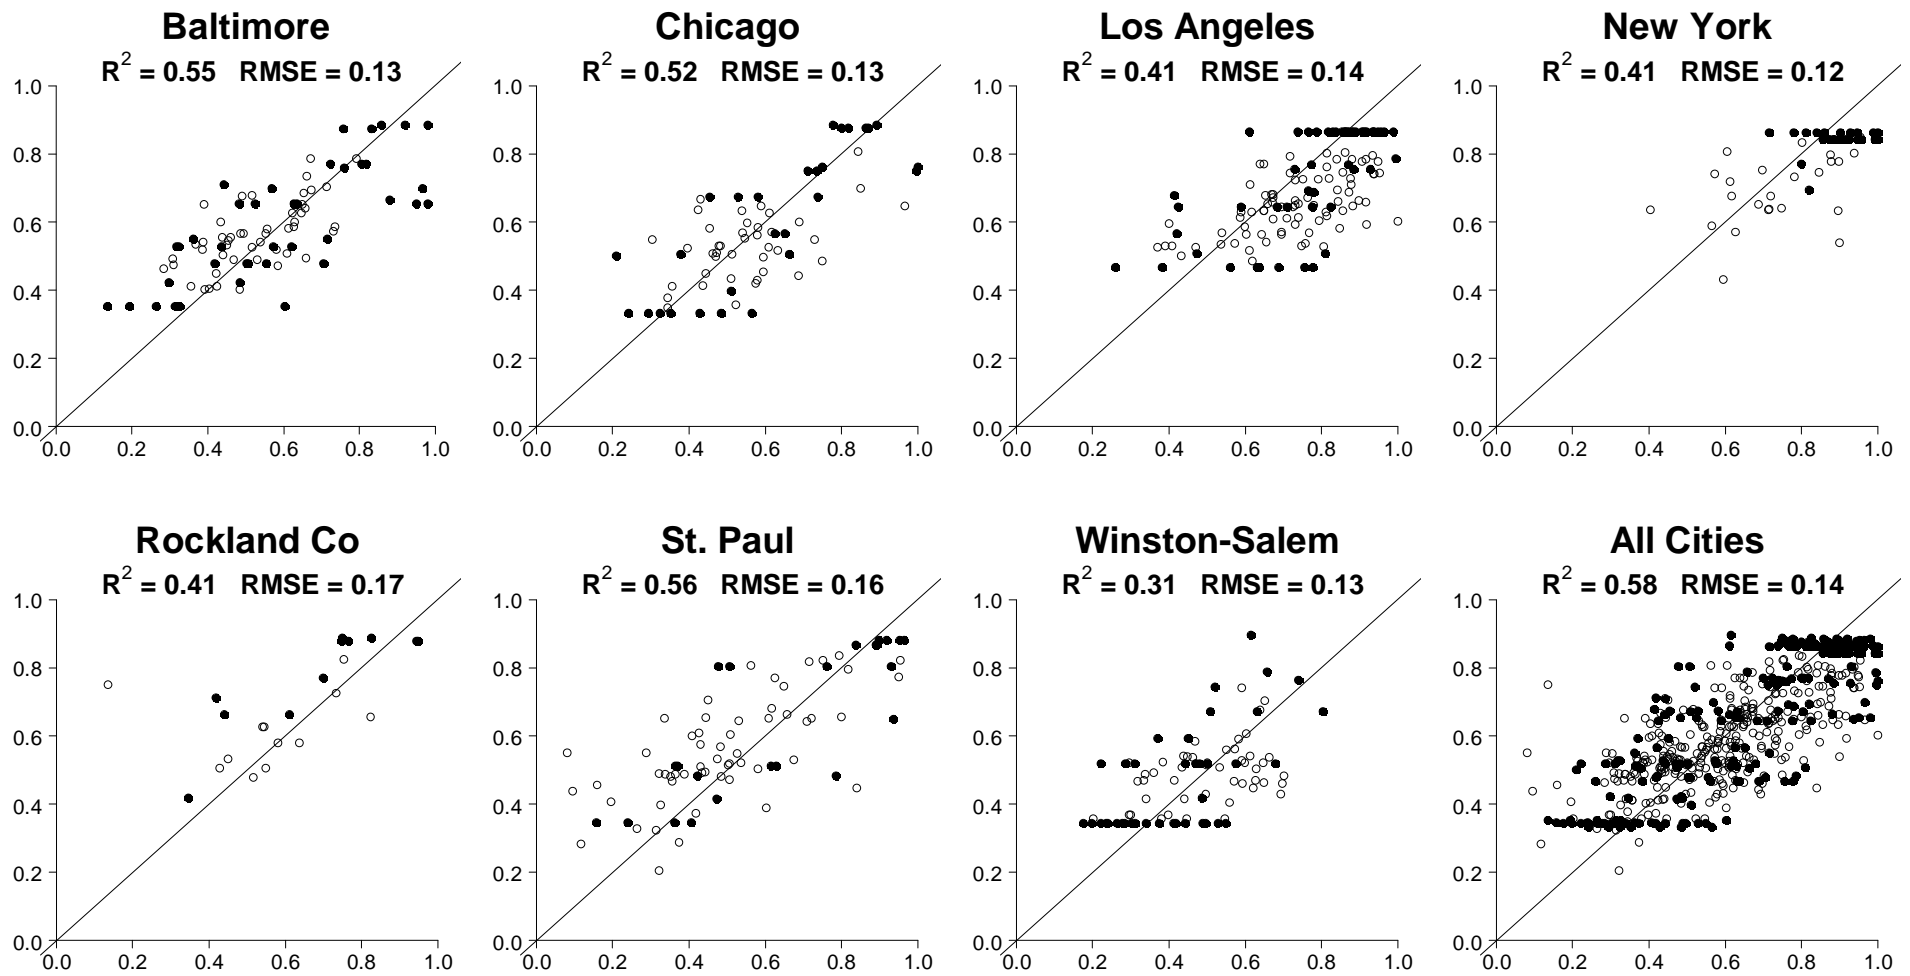

**Supplemental Material Figure 2.** Comparisons of measured infiltration efficiencies (x-axes) with values predicted from a leave-one-community out cross validation (y-axes) for the generalizable models shown in Table 2. White and black circles represent cold and warm seasons, respectively; lines represent 1:1.
